# Supplementary material for: Impact of a Workplace Screening Programme for Hypertension: A 5-Year Machine Learning-Based Analysis of a University Workforce Medical Records
Source: Preprints.org preprint supplement (doi:10.20944/preprints202405.1861.v1), 2024-05-28
Supplement: Supplementary file 1 [file supplementary]

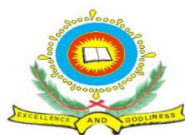

# **BOWEN UNIVERSITY, IWO, NIGERIA**

(Of The Nigerian Baptist Convention)

## **DIRECTORATE OF RESEARCH AND STRATEGIC PARTNERSHIPS**

Address: P.M.B. 284, Iwo

Osun State, Nigeria

Telephone: +2348030659661

Email: [research@bowen.edu.ng](mailto:research@bowen.edu.ng)

Website: [www.bowen.edu.ng](http://www.bowen.edu.ng)

### **Vice-Chancellor**

Joshua Olalekan OGUNWOLE (PhD)

Professor of Soil Science

### **Director of Research & Strategic Partnerships**

Emmanuel T AKINTAYO (PhD)

Professor of Bio-Industrial Chemistry

4<sup>th</sup> March, 2023

To Whom It May Concern,

I write to confirm that the research titled “**Retrospective Analysis of Bowen University Staff and Students Medical Screening Programme**” was duly submitted to the **Bowen University Research Ethical Board** for approval. After due consideration, the research is hereby approved to be carried out within the stipulated time and following all required ethical guidelines.

The proposed research will be carried out by **Dr. Olumide Thomas Adeleke** a Consultant Physician and Deputy Director, Directorate of Health Services, Family Medicine Department, Bowen University Teaching Hospital, Ogbomoso/Bowen University Hospital, Bowen University, Iwo, Osun State, Nigeria.

Thank you.

**Professor Akintayo Emmanuel T.**

Director of Research & Strategic Partnerships
